# Supplementary material for: Blue-wavelength light therapy for post-traumatic brain injury sleepiness, sleep disturbance, depression, and fatigue: A systematic review and network meta-analysis
Source: PubMed Central journal article supplement (PMC7861530; doi:10.1371/journal.pone.0246172), 2021-02-04
Supplement: pone.0246172.s004.pdf [file pone.0246172.s004.pdf]

## **S1 Text. Search strategies (July 4, 2020).**

Pubmed: 394

(light OR phototherapy) AND (((head OR brain) AND (trauma\* OR injur\*)) OR concussion)  
AND random\*

Scopus: 572

TITLE-ABS-

KEY ((light OR phototherapy) AND (((head OR brain) AND (trauma\* OR injur\*)) OR concussion) AND random\*)

Web of science: 326

You searched for: TOPIC: ((light OR phototherapy) AND (((head OR brain) AND (trauma\* OR injur\*)) OR concussion) AND random\*)

Timespan: All years. Indexes: SCI-EXPANDED, SSCI, A&HCI, ESCI.

Cochrane CENTRAL: 179

(light OR phototherapy) AND (((head OR brain) AND (trauma\* OR injur\*)) OR concussion)  
AND random\* in Title Abstract Keyword

Academic Search Complete: 160

(light OR phototherapy) AND (((head OR brain) AND (trauma\* OR injur\*)) OR concussion)  
AND random\*

CINAHL Complete: 66

(light OR phototherapy) AND (((head OR brain) AND (trauma\* OR injur\*)) OR concussion)  
AND random\*
