# Supplementary material for: Blue-wavelength light therapy for post-traumatic brain injury sleepiness, sleep disturbance, depression, and fatigue: A systematic review and network meta-analysis
Source: PubMed Central journal article supplement (PMC7861530; doi:10.1371/journal.pone.0246172), 2021-02-04
Supplement: pone.0246172.s005.pdf [file pone.0246172.s005.pdf]

**S1 Fig.** Risks of bias assessed using the RoB (Risk of Bias) 2 tool for randomized trials<sup>1,2</sup>

(A) Within individual trials

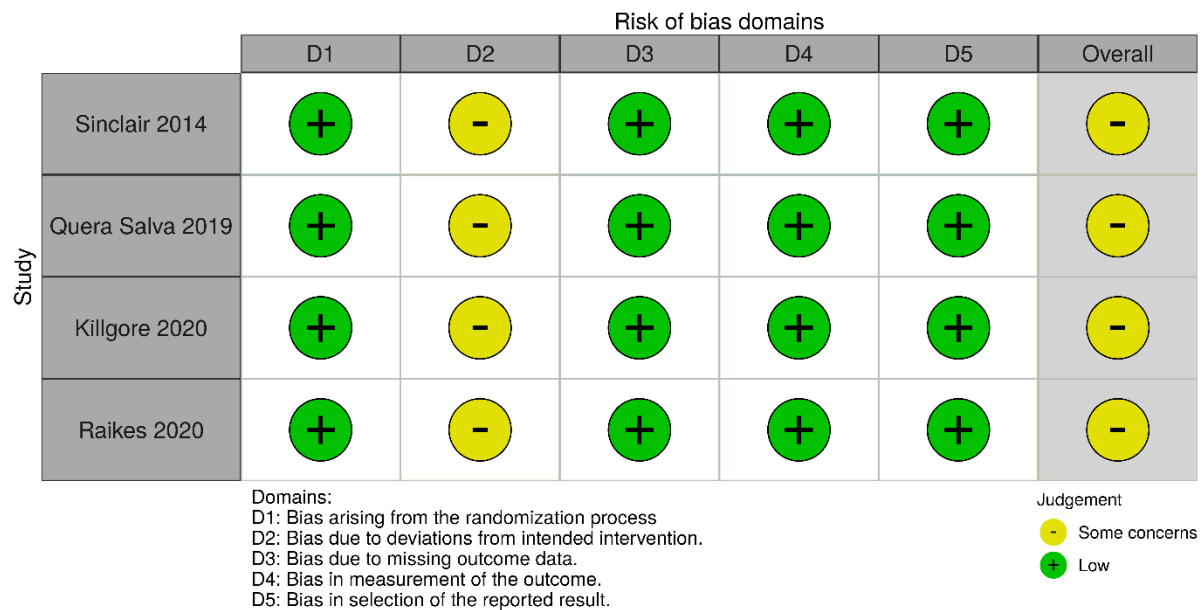

(B) Across included trials

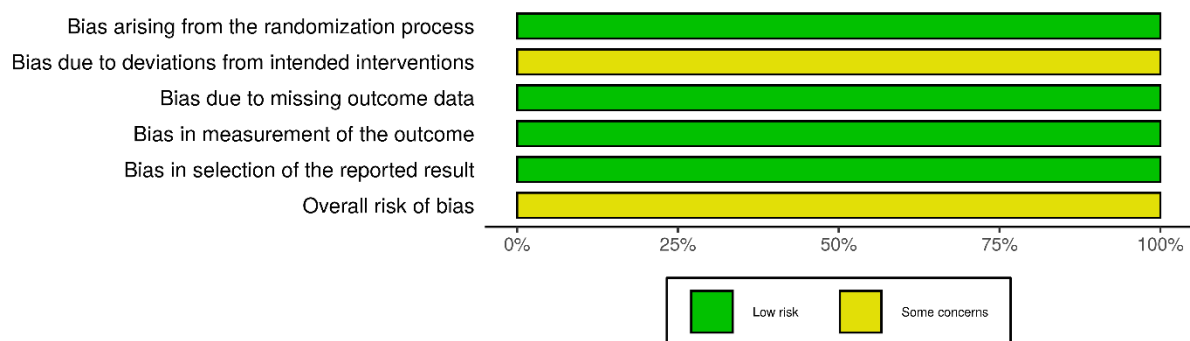

- Higgins J, Thomas J, Chandler J, et al. *Cochrane Handbook for Systematic Reviews of Interventions*. 2nd Edition. Chichester (UK): John Wiley & Sons, 2019.
- McGuinness LA, Higgins JPT. Risk-of-bias VISualization (robvis): An R package and Shiny web app for visualizing risk-of-bias assessments. *Res Synth Methods*. Epub ahead of print 26 April 2020. DOI: 10.1002/jrsm.1411.
