# Supplementary material for: Blue-wavelength light therapy for post-traumatic brain injury sleepiness, sleep disturbance, depression, and fatigue: A systematic review and network meta-analysis
Source: PubMed Central journal article supplement (PMC7861530; doi:10.1371/journal.pone.0246172), 2021-02-04

**S2 Fig.** Funnel plots to visualize the publication bias of five outcomes: (A) for sleepiness; (B) for sleep disturbance; (C) for depression; (D) for fatigue; and (E) for dropout rates.

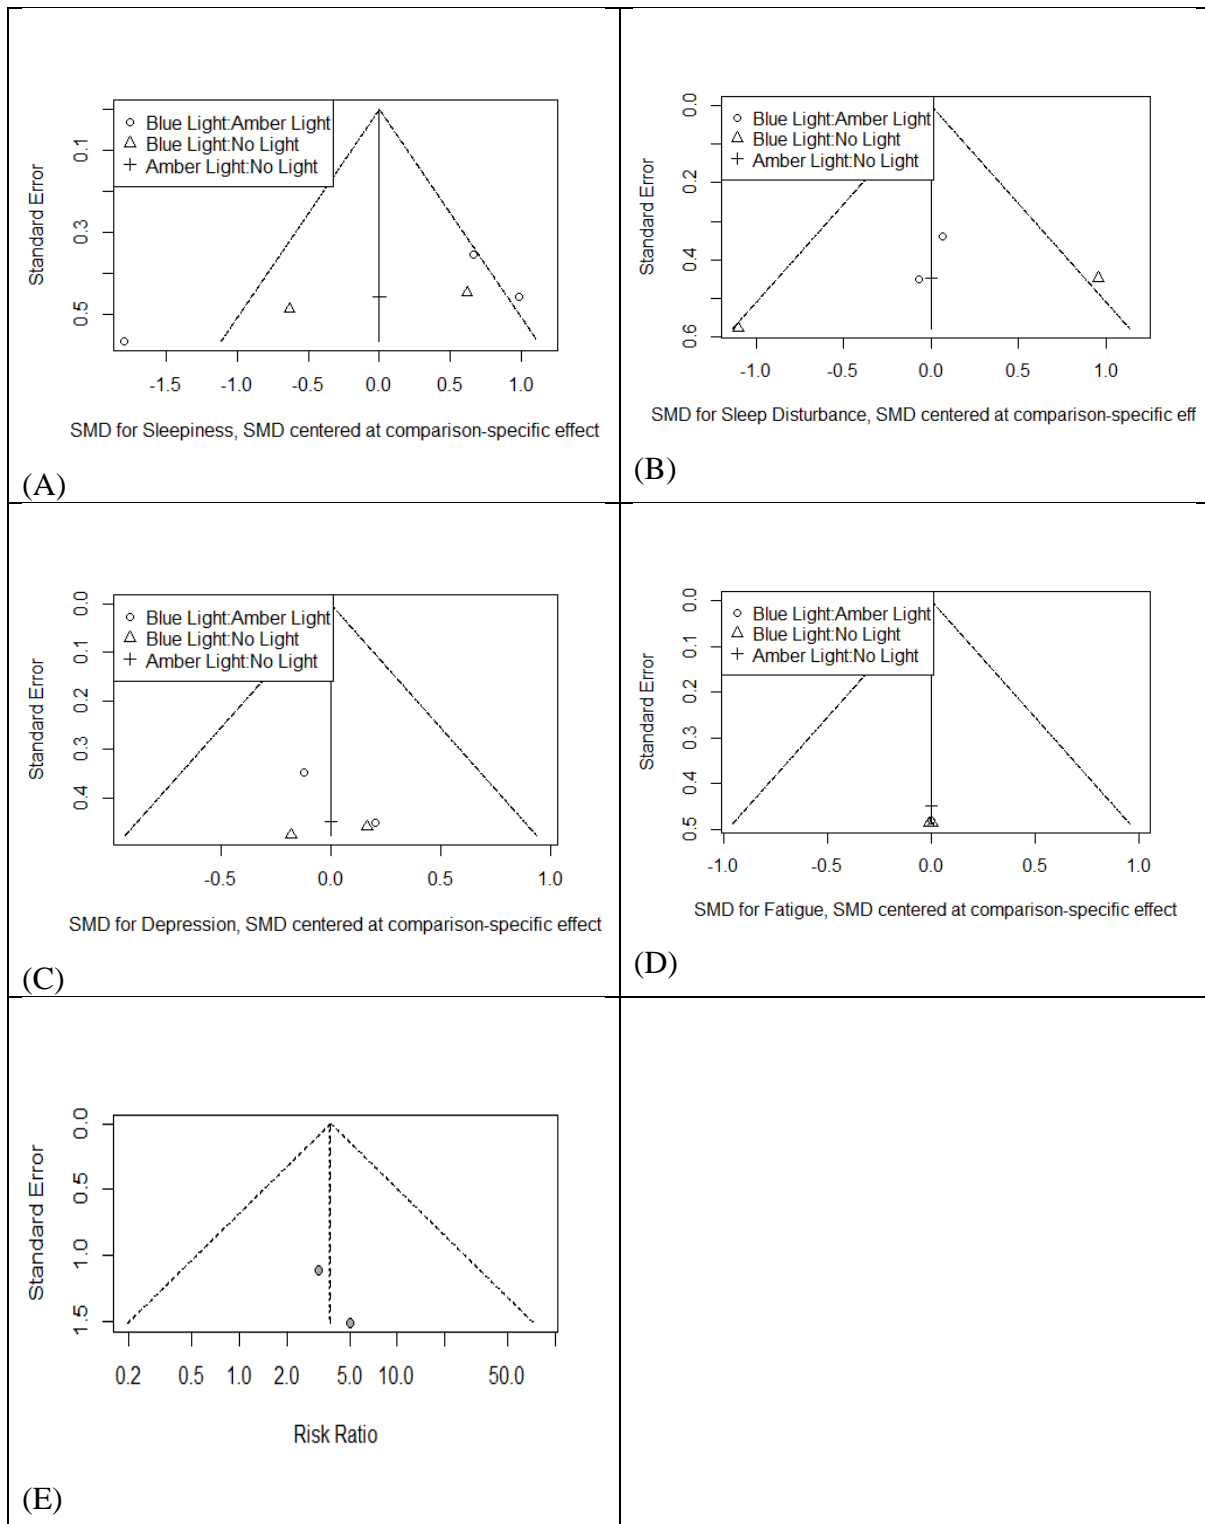

Supplement: pone.0246172.s006.pdf [file pone.0246172.s006.pdf]
